# Supplementary material
Source: PubMed Central journal article supplement (PMC3911095)
Supplement: AEM.03104-13_zam002145051so1.pdf [file AEM.03104-13_zam002145051so1.pdf]

1 **Supplementary Table 1.** Number of high quality pyrosequenced 16S rRNA gene fragments  
 2 obtained in each library from samples taken during the 64-day experiment with (Flasks 1 and 2) or  
 3 without (Flasks 4 and 5) crude oil, and the corresponding relative abundance of *Arenibacter* OTU-  
 4 202.

| 6  | Incubation and day         | Number of sequences | OTU-202 <sup>a</sup> |
|----|----------------------------|---------------------|----------------------|
| 7  | <u>Flask 1 (with oil):</u> |                     |                      |
| 8  | day 7                      | 2726                | 0.0                  |
| 9  | day 10                     | 170                 | 0.0                  |
| 10 | day 35                     | 1958                | 0.0                  |
| 11 | day 64                     | 5128                | 1.3                  |
| 12 | <u>Flask 2 (with oil):</u> |                     |                      |
| 13 | day 7                      | 1878                | 0.0                  |
| 14 | day 10                     | 163                 | 0.0                  |
| 15 | day 35                     | 2312                | 0.0                  |
| 16 | day 64                     | 2034                | 1.1                  |
| 17 | <u>Flask 4 (no oil):</u>   |                     |                      |
| 18 | day 7                      | 1078                | 0.0                  |
| 19 | day 10                     | 358                 | 0.0                  |
| 20 | day 35                     | 1467                | 0.7                  |
| 21 | day 64                     | 3204                | 0.7                  |
| 22 | <u>Flask 5 (no oil):</u>   |                     |                      |
| 23 | day 7                      | 1754                | 0.0                  |
| 24 | day 10                     | 909                 | 0.0                  |
| 25 | day 35                     | 4141                | 0.4                  |
| 26 | day 64                     | 137                 | 0.8                  |

27 <sup>a</sup> Relative abundance in each library.

28
